# Supplementary material for: A porous organic polymer nanosphere-based fluorescent biosensing platform for simultaneous detection of multiplexed DNA via electrostatic attraction and π–π stacking interactions
Source: Royal Society of Chemistry journal article supplement (doi:10.1039/d1ra07435k), 2021-01-01
Supplement: d1ra07435k1.pdf [file d1ra07435k1.pdf]

**1 Porous Organic Polymer Nanosphere-Based Fluorescent Biosensing Platform for**  
**2 Simultaneous Detection of Multiplexed DNA via Electrostatic Attraction and  $\pi$ - $\pi$**   
**3 Stacking Interactions**

4 *Yujie Sun*<sup>#</sup>, *Zhenzhong Lu*<sup>#</sup>, *Wenlin Ma*, *Rui Wang*, *Chengwu Zhang*, *Jinhua Liu*<sup>\*</sup>

5 ,

6

7

8

9

10

11

12

13

14

15

16

17

18

19

20

21

22

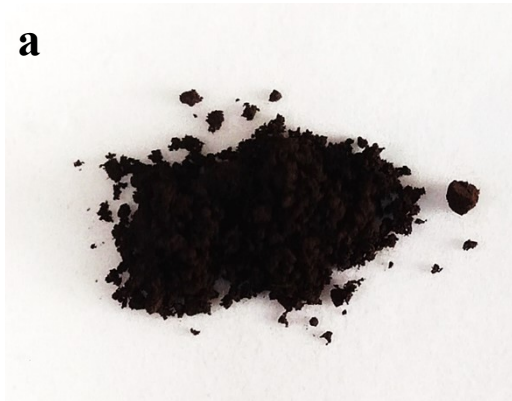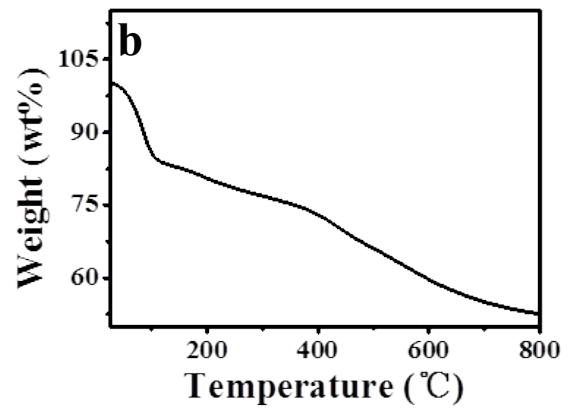

23

24 **Fig. S1.** (a) The picture of POP powder; (b) TGA of POP.

25

26

27

28

29

30

31

32

33

34

35

36

37

38

39

40

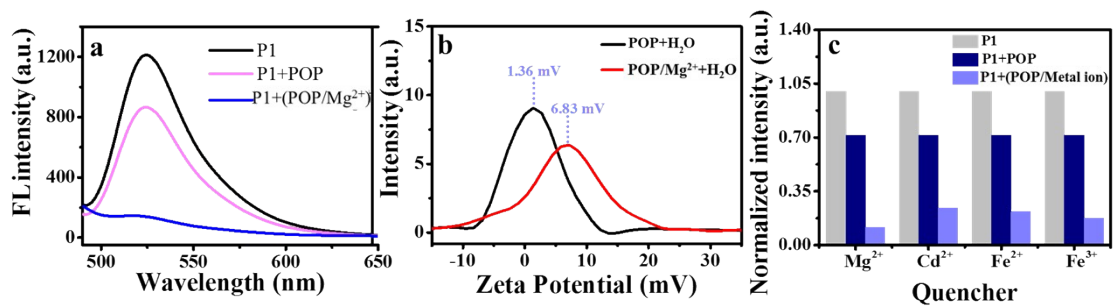

41

42 **Fig. S2.** (a) Fluorescence emission spectra of P1, P1+POP and P1+ (POP/Mg<sup>2+</sup>); (b)

43 The zeta potentials of POP+H<sub>2</sub>O and POP/Mg<sup>2+</sup>+H<sub>2</sub>O; (C) Normalization intensity of

44 P1, P1+POP, P1+(POP/Metal ion) for Mg<sup>2+</sup>, Cd<sup>2+</sup>, Fe<sup>2+</sup> and Fe<sup>3+</sup>, respectively.

45

46

47

48

49

50

51

52

53

54

55

56

57

58

59

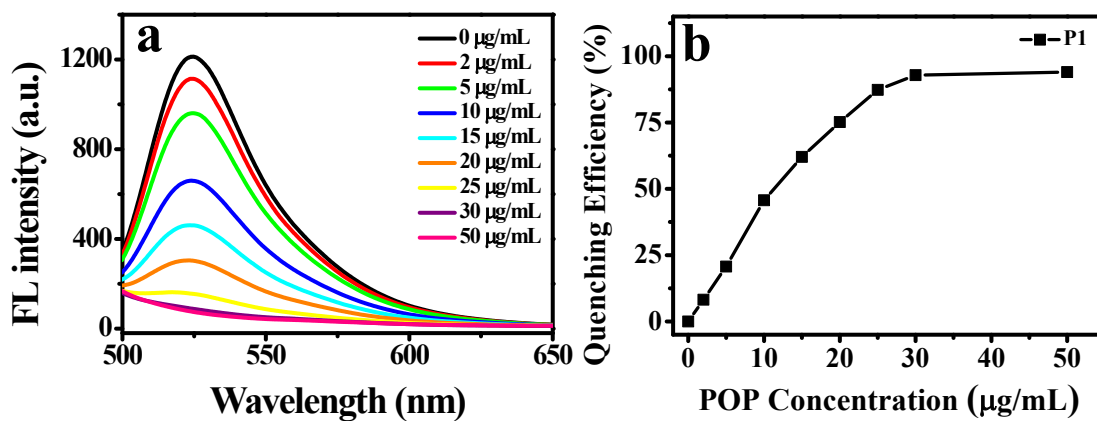

60

61 **Fig. S3.** (a) Fluorescence emission spectra and quenching efficiency (b) of P1 (25 nM)

62 with different concentrations of POP (0-50 mg/mL).

63

64

65

66

67

68

69

70

71

72

73

74

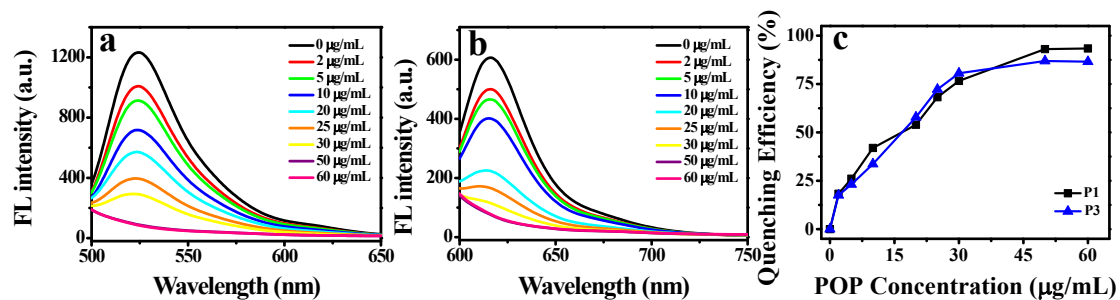

75 **Fig. S4.** Fluorescence emission spectra of P1 (a), P2 (b), and corresponding quenching  
 76 efficiency (c) with different concentrations of POP (0-60 mg/mL).

77

78

79

80

81

82

83

84

85

86

87

88

89

90

91

92

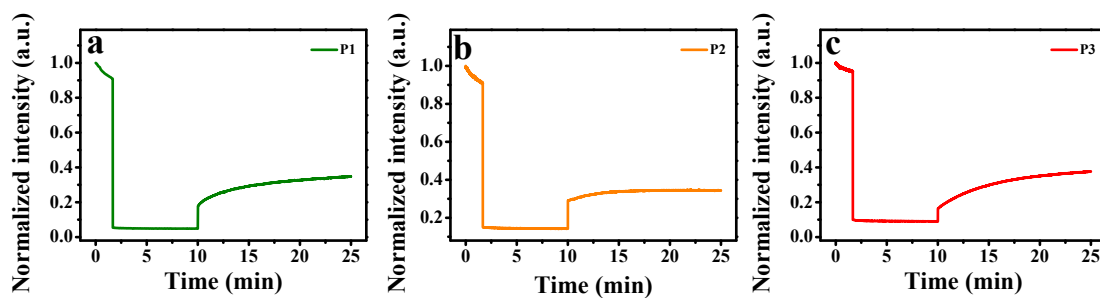

93 **Fig. S5.** Fluorescence intensity of P1 (a), P2 (b) and P3 (c) change with time in the  
94 presence of POP and Target DNA successively.

95

96

97

98

99

100

101

102

103

104

105

106

107

108

109

110

111

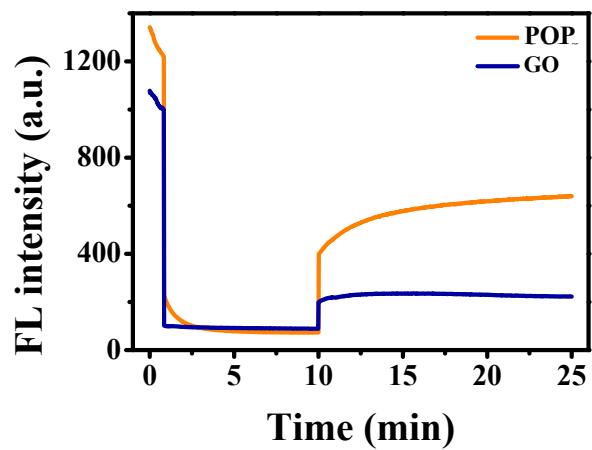

112

113 **Fig. S6.** Fluorescence intensity of P1 change with time upon the introduction of  
114 different quenchers (GO and POP, 30  $\mu\text{g/mL}$ ) and T1 (200 nM).

115

116

117

118

119

120

121

122

123

124

125

126

127

128

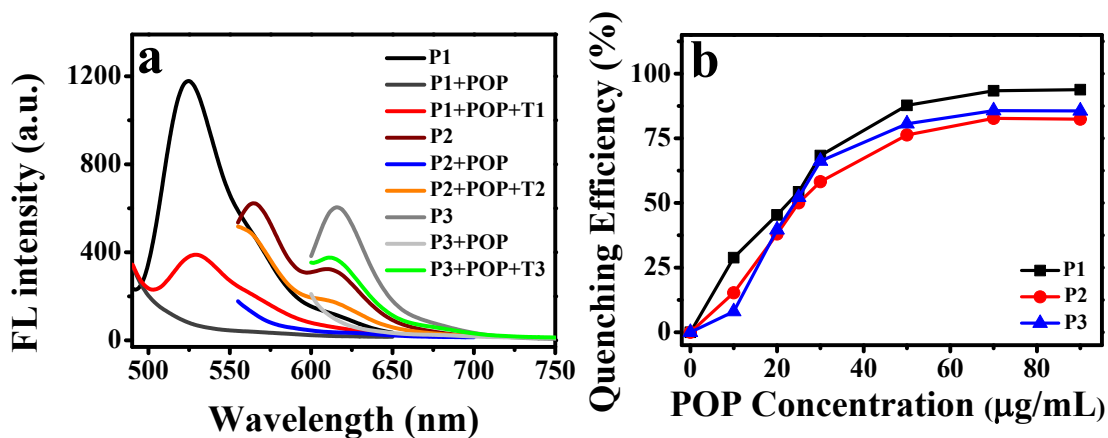

129

130 **Fig. S7.** (a) Fluorescence spectra of probes (P1, P2, and P3) under different conditions

131 (P, P+POP, P+POP+T), respectively. (b) Quenching efficiency of P (P1, P2 and P3)

132 caused by POP with different concentrations (0, 10, 20, 25, 30, 50, 70 and 90  $\mu\text{g/mL}$ ).

133

134

135

136

137

138

139

140

141

142

143

144



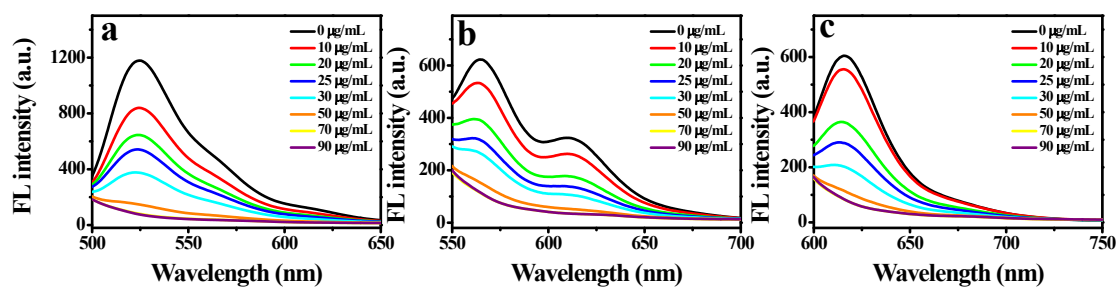

145

146 **Fig. S8.** Fluorescence emission spectra of P1 (a), P2 (b) and P3(c) change with different

147 concentrations of POP (0-90 mg/mL).

148

149

150

151

152

153

154

155

156

157

158

159

160

161

162

163

164

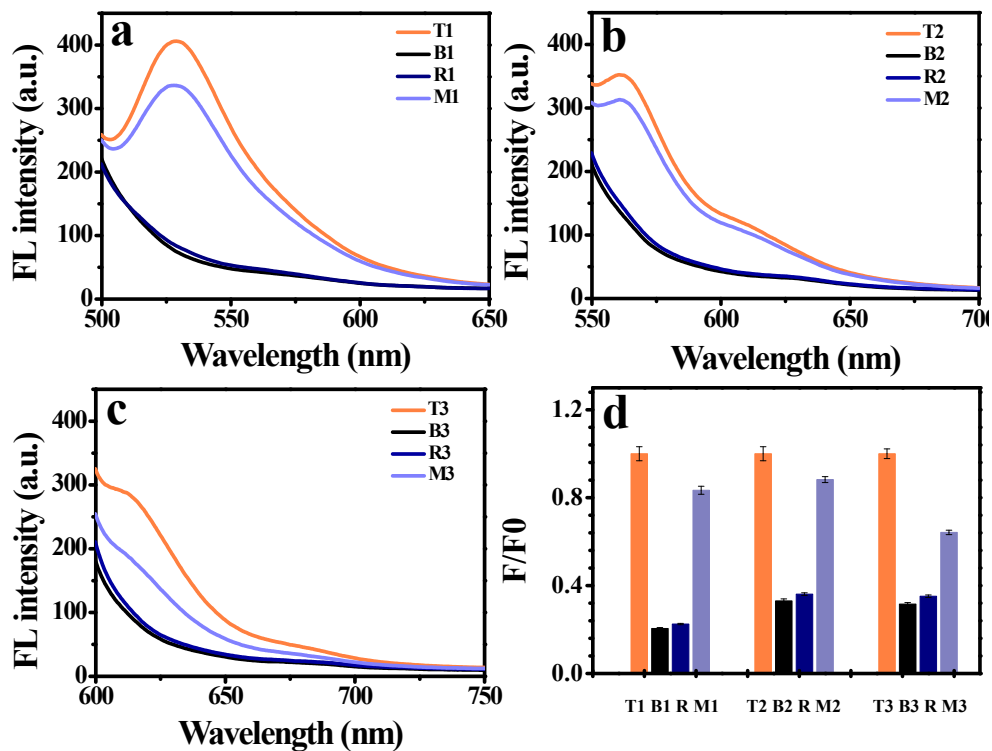

165

166 **Fig. S9.** Fluorescence spectra of probes (P1, P2 and P3) in one system toward T1 (a),  
 167 T2 (b) and T3 (c); (d) Specificity of probes (P1, P2, P3) for targets (T1, T2, T3). B (1-  
 168 3), blank; R (1-3), random sequence for P (1-3); M (1-3), base mismatched sequence  
 169 for P (1-3), respectively.

170

171

172

173

174

175

176

177

178

179 **Table S1.** DNA sequences used in this work.

| <b>Oligonucleotide</b> | <b>Sequence (5-3)*</b>               |
|------------------------|--------------------------------------|
| P1                     | CAGTTACATTCTCCCAGTTGATT-FAM          |
| P2                     | ACCTGGGGGAGTATTGCGGAGGAAGGT-Cy3      |
| P3                     | AGACTCTTGAGTTCTCAGTATG-Texas Red     |
| T1                     | AATCAACTGGGAGAATGTA ACTG             |
| T2                     | ACCTTCCTCCGCAATACTCCCCCAGGT          |
| T3                     | CATACTGAGAACTCAAGAGTCT               |
| M1                     | AATCAACTG <u>T</u> GAGAATGTA ACTG    |
| M2                     | ACCTTCCTCCGCA <u>T</u> TACTCCCCCAGGT |
| M3                     | CAT <u>A</u> TTGAGAACTCAAGAGTCT      |
| R                      | ACCTGGGGGAGTATTGCGGAGGAAGGT          |

180

181 \* The mutation base is indicated by underline

182

183

184

185

186

187

188

189

190

191

192

193 **Table S2.** Comparison of different fluorescent DNA sensors.

| Materials                       | Sensitivity | Detection time | Fluorescent reporter  | Multiplexed detection | Reference |
|---------------------------------|-------------|----------------|-----------------------|-----------------------|-----------|
| SWNT                            | 4 nM        | several hours  | FAM                   | Not reported          | [39]      |
| AuNP                            | nM          | minutes        | Rhodamine 6G          | Yes                   | [40]      |
| Graphene oxide (GO)             | 100 pM      | ≈1 min         | FAM, Cy3, ROX         | Yes                   | [41]      |
| GO (premixing)                  | ≈10 nM      | 30 min         | FAM                   | Not reported          | [42]      |
| GO                              | 2 nM        | 30 min         | FAM                   | Not reported          | [43]      |
| GO                              | 0.5 nM      | 60-90 min      | Silver                | Yes                   | [44]      |
| GO                              | 75 nM       | 30 min         | Graphene quantum dots | Not reported          | [45]      |
| g-C <sub>3</sub> N <sub>4</sub> | 81 pM       | Not reported   | FAM, ROX              | No                    | [46]      |
| MOFs(UiO-66-NH <sub>2</sub> )   | 10 nM       | 20 min         | FAM                   | Not reported          | [47]      |
| MOFs(Cu(H <sub>2</sub> dtoa))   | 3 nM        | 4 h            | FAM                   | Not reported          | [48]      |
| POP                             | 50 pM       | 25 min         | FAM, Cy3, Texas Red   | Yes                   | This work |

194

195

196

197

198

199

200

201

202

203

204

205

206

207

208

209 **Table S3.** The quenching efficiency and recovery of different detected system.

| <b>System</b>        | <b>Target DNA</b> | <b>QE (%)</b> | <b>Recovery (%)</b> |
|----------------------|-------------------|---------------|---------------------|
| <b>Single chain</b>  | T1                | 94.43         | 38.37               |
|                      | T2                | 83.12         | 55.90               |
|                      | T3                | 85.80         | 53.04               |
| <b>Double chains</b> | T1&T2             | 87.61         | 28.70               |
|                      |                   | 68.18         | 83.09               |
|                      | T2&T3             | 70.85         | 78.29               |
|                      |                   | 48.92         | 70.34               |
|                      | T1&T3             | 93.25         | 24.55               |
|                      | 86.92             | 29.68         |                     |
| <b>Three chains</b>  | T1&T2&T3          | 92.75         | 31.18               |
|                      |                   | 87.62         | 28.64               |
|                      |                   | 89.63         | 25.05               |

210

211

212
